# Supplementary material
Source: PubMed Central journal article supplement (PMC7202863)

# Fluorescent bead image

## Good quality

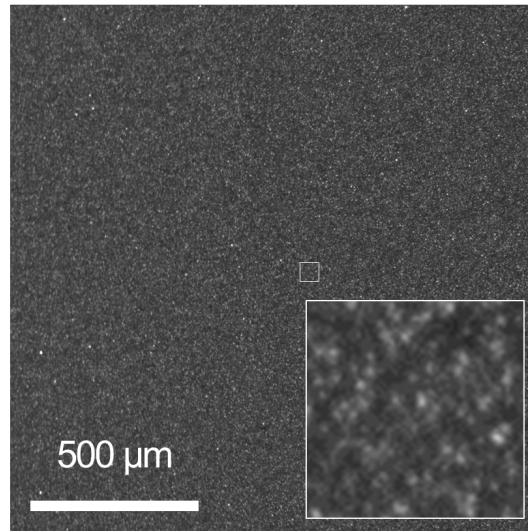

## Bad quality

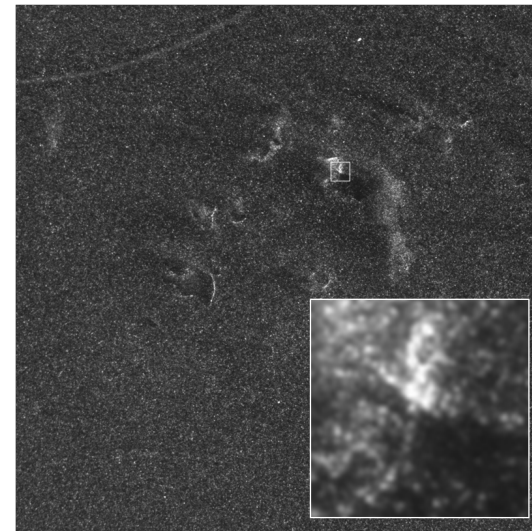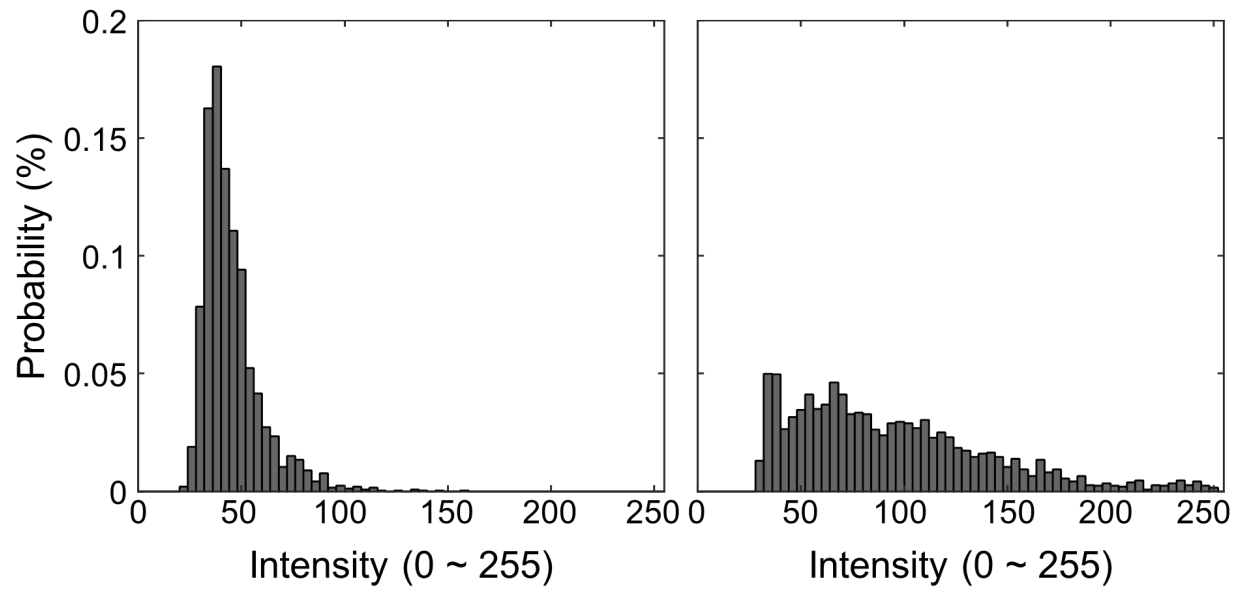

Supplement: NIHMS1561431-supplement-Supplementary_Material.pdf [file NIHMS1561431-supplement-Supplementary_Material.pdf]
